# Supplementary material for: Comparison of the oxidative pyrolysis behaviors of black liquor solids, alkali lignin and enzymatic hydrolysis/mild acidolysis lignin
Source: Royal Society of Chemistry journal article supplement (doi:10.1039/c5ra15455c), 2015-01-01
Supplement: c5ra15455c1.pdf [file c5ra15455c1.pdf]

**Table S1.** Analysis of pyrolysis products from BLS, AL and EMAL

| Rt(min) | Compound                                      | Mw  | Area percent (%) |       |       |
|---------|-----------------------------------------------|-----|------------------|-------|-------|
|         |                                               |     | BLS              | AL    | EMAL  |
| 1.613   | CO <sub>2</sub>                               | 44  | 3.76             | 8.63  | 10.5  |
| 2.058   | Acetic acid                                   | 60  | -                | 0.3   | 0.65  |
| 2.318   | Benzene                                       | 78  | -                | 1.65  | 0.34  |
| 5.115   | 2-Cyclopenten-1-one, 3-methyl-                | 96  | 1.68             | -     | -     |
| 5.289   | Phenol                                        | 94  | 2.29             | 0.44  | 0.37  |
| 6.236   | Indene                                        | 116 | 0.48             | -     | -     |
| 6.317   | Phenol,2-methyl-                              | 108 | 2.72             | 0.61  | 0.51  |
| 6.618   | Phenol,4-methyl-                              | 108 | 4.42             | 1.02  | 1.08  |
| 6.872   | Guaiacol                                      | 124 | 20.98            | 16.06 | 8.59  |
| 7.635   | Benzene, 1,2-dimethoxy-                       | 138 | 2.74             | -     | -     |
| 7.681   | Phenol, 2,4-dimethyl-                         | 122 | 4.83             | 0.87  | 0.71  |
| 7.762   | 2-Methylindene                                | 130 | 1.67             | -     | -     |
| 7.97    | Phenol, 3,4-dimethyl-                         | 122 | 2.96             | -     | -     |
| 7.981   | Phenol, 4-ethyl-                              | 122 | -                | -     | 0.67  |
| 8.363   | 4-methyl-guaiacol                             | 138 | 13.99            | 13.20 | 9.42  |
| 8.444   | 1,2-Benzenediol                               | 110 | -                | 1.82  | 1.85  |
| 8.675   | 4-Vinyl phenol                                | 120 | -                | -     | 1.59  |
| 8.964   | 3,4-Dimethoxytoluene                          | 152 | 3.00             | 0.94  | 0.64  |
| 9.253   | Phenol, 3-ethyl-5-methyl-                     | 136 | 1.65             | -     | -     |
| 9.565   | Phenol, 4-ethyl-2-methoxy-                    | 152 | 9.64             | 4.78  | 2.41  |
| 9.669   | 1H-Inden-1-one, 2,3-dihydro-                  | 132 | 0.68             | -     | -     |
| 9.727   | 1,2-Benzenediol, 4-methyl-                    | 124 | -                | 2.71  | 2.01  |
| 9.865   | Phenol, 2,4,6-trimethyl-                      | 136 | 0.96             | -     | -     |
| 10.062  | 4-vinyl-guaiacol                              | 150 | 6.53             | 13.98 | 11.98 |
| 10.13   | Benzene, 4-ethyl-1,2-dimethoxy-               | 166 | 2.24             | -     | -     |
| 10.628  | Eugenol                                       | 164 | -                | 2.41  | 2.88  |
| 10.755  | Phenol, 2-methoxy-4-propyl-                   | 166 | 1.54             | 1.68  | 0.74  |
| 10.998  | 1,3-Benzenediol, 4,5-dimethyl-                | 138 | -                | 1.08  | -     |
| 11.229  | Vanillin                                      | 152 | -                | 7.19  | 5.73  |
| 11.83   | Phenol, 2-methoxy-4-(1-propenyl)-, (E)-       | 164 | 4.50             | 7.05  | 11.36 |
| 12.327  | Ethanone, 1-(4-hydroxy-3-methoxyphenyl)-      | 166 | -                | 6.36  | 4.39  |
| 12.859  | 2-Propanone, 1-(4-hydroxy-3-methoxyphenyl)-   | 180 | -                | 4.61  | 1.75  |
| 14.246  | Benzeneacetic acid, 4-hydroxy-3-methoxy-      | 182 | 3.81             | 2.61  | 3.90  |
| 14.512  | 4-((1E)-3-Hydroxy-1-propenyl)-2-methoxyphenol | 180 | -                | -     | 1.61  |
| 14.691  | 3-(3,4-Dimethoxyphenyl)-1-propanol            | 196 | 1.50             | -     | -     |
| 15.274  | coniferyl aldehyde                            | 178 | -                | -     | 14.32 |
